# Supplementary material for: A plastic and reconstructive surgery landscape assessment of Malawi: a scoping review of Malawian literature
Source: Springer Nature journal article supplement (doi:10.1186/s40001-022-00714-y), 2022-07-12
Supplement: MOESM1 [file 23259056]

**Appendix 1.** Complete MeSH Search Strategy used on Each Database.

|                                                   |
|---------------------------------------------------|
| Terms                                             |
| (Surgery) AND (Malawi)                            |
| (Plastic Surgery) AND (Malawi)                    |
| (Oral Surgery) AND (Malawi)                       |
| (Reconstructive Surgery) AND (Malawi)             |
| (Reconstructive Surgical Procedures) AND (Malawi) |
| (Reconstruction) AND (Malawi)                     |
| (Trauma) AND (Malawi)                             |
| (Burns) AND (Malawi)                              |
| (Skin Graft) AND (Malawi)                         |
| (Cleft Palate) AND (Malawi)                       |
| (Cleft Lip) AND (Malawi)                          |
| (Surgery Department, Hospital) AND (Malawi)       |
| (Surgeons) AND (Malawi)                           |
| (Oral and Maxillofacial Surgeons) AND (Malawi)    |
| (Congenital) AND (Malawi)                         |
| (Maxillofacial) AND (Malawi)                      |
