# Supplementary material for: A plastic and reconstructive surgery landscape assessment of Malawi: a scoping review of Malawian literature
Source: Springer Nature journal article supplement (doi:10.1186/s40001-022-00714-y), 2022-07-12
Supplement: MOESM2 [file 23259056]

## Appendix 2. REDCap Survey to Chart Results.

|                                                                               |
|-------------------------------------------------------------------------------|
| • First Author (Last Name et al): _____                                       |
| • Year of Publication: _____                                                  |
| • Journal: _____                                                              |
| • Paper Title: _____                                                          |
| • Is an author affiliated with an institution in Malawi? Yes or No            |
| ○ If yes, is it the first author? Yes or No                                   |
| ○ Is the senior author from Malawi? Yes or No                                 |
| • Reviewer 1: Include this Study? Yes or No                                   |
| ○ If no, reason for exclusion:                                                |
| ▪ No Malawian author                                                          |
| ▪ Incorrect study focus                                                       |
| ▪ Grey literature                                                             |
| ▪ Other                                                                       |
| • If other, please list: _____                                                |
| • Reviewer 2: Include this Study? Yes or No                                   |
| ○ If no, reason for exclusion:                                                |
| ▪ No Malawian author                                                          |
| ▪ Incorrect study focus                                                       |
| ▪ Grey literature                                                             |
| ▪ Other                                                                       |
| • If other, please list: _____                                                |
| • Study Population:                                                           |
| ○ Surgeons                                                                    |
| ▪ If yes, select PRS Surgeons, OMF Surgeons, Both, or Surgeons (undefined)    |
| ○ Surgical Residents                                                          |
| ▪ If yes, select PRS Residents, OMF Residents, Both, or Residents (undefined) |
| ○ Clinical Officers                                                           |
| ○ Medical Students                                                            |
| ○ Surgical Patients                                                           |
| ▪ If yes, select Pediatric, Adult, or Both                                    |
| ○ Other                                                                       |
| ▪ If other, please list: _____                                                |
| ○ Not Applicable                                                              |
| • Study setting:                                                              |
| ○ District Hospital                                                           |
| ○ Secondary Hospital                                                          |
| ○ Tertiary Hospital                                                           |
| ○ Community                                                                   |
| ○ Other                                                                       |
| ▪ If other, please list: _____                                                |
| ○ Not Applicable                                                              |
| • Does this study name a Hospital(s)? Yes or No                               |
| ○ If yes, list hospital(s) name: _____                                        |
| • Study Design:                                                               |
| ○ Qualitative studies                                                         |
| ○ Cross-sectional analyses                                                    |
| ○ Questionnaires                                                              |
| ○ Longitudinal analysis                                                       |
| ○ Controlled trials                                                           |
| ○ Case reports                                                                |
| ○ Observational studies                                                       |
| ○ Other                                                                       |
| ▪ If other, please list: _____                                                |
| • Category of PRS:                                                            |
| ○ Burns                                                                       |
| ○ Congenital anomaly                                                          |
| ○ Trauma-related                                                              |
| ○ Reconstruction                                                              |
| ○ Other                                                                       |
| ▪ If other, please list: _____                                                |
| • Does the study's finding include?                                           |
| ○ Epidemiology                                                                |
| ▪ If yes, describe: _____                                                     |

|                               |
|-------------------------------|
| ○ Provider Demographics       |
| ▪ If yes, describe: _____     |
| ○ Barriers to Care            |
| ▪ If yes, describe: _____     |
| ○ Suggested Solutions         |
| ▪ If yes, describe: _____     |
| • Study's Funding Source:     |
| ○ No Funding                  |
| ○ Not-For-Profit Sponsored    |
| ○ University-Sponsored        |
| ○ Public-Sponsored            |
| ○ Private-Sponsored           |
| ○ Not Reported in Publication |
